# Supplementary material for: Retracted Article: Black mesoporous anatase TiO2 nanoleaves: a high capacity and high rate anode for aqueous Al-ion batteries
Source: Royal Society of Chemistry journal article supplement (doi:10.1039/c3ta13906a), 2013-11-04
Supplement: c3ta13906a.pdf [file c3ta13906a.pdf]

## SUPPORTING INFORMATION

### **Black mesoporous anatase TiO<sub>2</sub> nanoleaves: A high capacity and high rate anode for aqueous Al-ion batteries**

Ying Juan He,<sup>a</sup> Jun Fang Peng,<sup>a</sup> Wei Chu,<sup>\*b</sup> Yuan Zhi Li<sup>a</sup> and Dong Ge Tong<sup>\*a</sup>

<sup>a</sup>Mineral Resources Chemistry Key Laboratory of Sichuan Higher Education Institutions, College of Materials and Chemistry & Chemical Engineering, Chengdu University of Technology, Chengdu 610059, China. E-mail: tongdongge@163.com; Fax: +86-28-8407 9074

<sup>b</sup>College of Chemical Engineering, Sichuan University, Chengdu 610065, China. E-mail: chuwei65@foxmail.com; Fax: +86-28-8540 3397

Summary: 20 Pages; 2 Tables; 26 Figures;

**Table S1 XRD Rietveld refinement results and conductivity of the samples**

| Samples                                                                                  | Composition                                | a / nm     | c / nm     | Rp/% | Rwp/% | Rb/% | Conductivity/<br>Scm <sup>-1</sup> |
|------------------------------------------------------------------------------------------|--------------------------------------------|------------|------------|------|-------|------|------------------------------------|
| commercial white anatase TiO <sub>2</sub>                                                | TiO <sub>2</sub>                           | 0.38007(3) | 0.94898(4) | 8.09 | 6.01  | 4.12 | 9.7×10 <sup>-7</sup>               |
| black anatase TiO <sub>2</sub> nanoleaves                                                | TiO <sub>1.976</sub> (NH) <sub>0.024</sub> | 0.38124(2) | 0.95099(1) | 8.23 | 5.45  | 4.04 | 3.0×10 <sup>-1</sup>               |
| commercial white anatase TiO <sub>2</sub> after SPP<br>treatment with NH <sub>4</sub> Cl | TiO <sub>1.983</sub> (NH) <sub>0.017</sub> | 0.38092(4) | 0.95075(7) | 8.75 | 5.89  | 4.07 | 9.9×10 <sup>-2</sup>               |
| white anatase TiO <sub>2</sub> <sup>18</sup>                                             | TiO <sub>2</sub>                           | 0.3887(7)  | 0.94894(7) | -    | -     | -    | 2.2×10 <sup>-7</sup>               |
| black anatase TiO <sub>2</sub> <sup>18</sup>                                             | TiO <sub>1.974</sub> (NH) <sub>0.026</sub> | 0.38038(3) | 0.95148(7) | -    | -     | -    | 8.2×10 <sup>-2</sup>               |

**Table S2 Impedance parameters of the samples**

| Samples                                   | Cycles                     | $R_e / \Omega$ | $R_{sei} / \Omega$ | $R_{ct} / \Omega$ | $Z_w / \Omega$ |
|-------------------------------------------|----------------------------|----------------|--------------------|-------------------|----------------|
| Commercial white TiO <sub>2</sub> anatase | no cycling                 | 1.2            | -                  | 68.7              | 203            |
|                                           | the 1 <sup>st</sup> cycle  | 1.8            | 2.3                | 103.1             | 70.6           |
|                                           | the 10th cycle             | 2.6            | 2.7                | 72.0              | 47.5           |
|                                           | the 30 <sup>th</sup> cycle | 3.9            | 3.2                | 79.2              | 55.5           |
|                                           | the 50 <sup>th</sup> cycle | 4.2            | 3.6                | 85.3              | 60.3           |
| Black anatase TiO <sub>2</sub> nanoleaves | no cycling                 | 1.1            | -                  | 24.7              | 65.2           |
|                                           | the 1 <sup>st</sup> cycle  | 1.7            | 4.8                | 30.8              | 20.4           |
|                                           | the 10th cycle             | 2.4            | 5.2                | 16.7              | 18.7           |
|                                           | the 30 <sup>th</sup> cycle | 3.7            | 5.4                | 17.8              | 19.6           |
|                                           | the 50 <sup>th</sup> cycle | 4.2            | 5.6                | 18.5              | 20.3           |

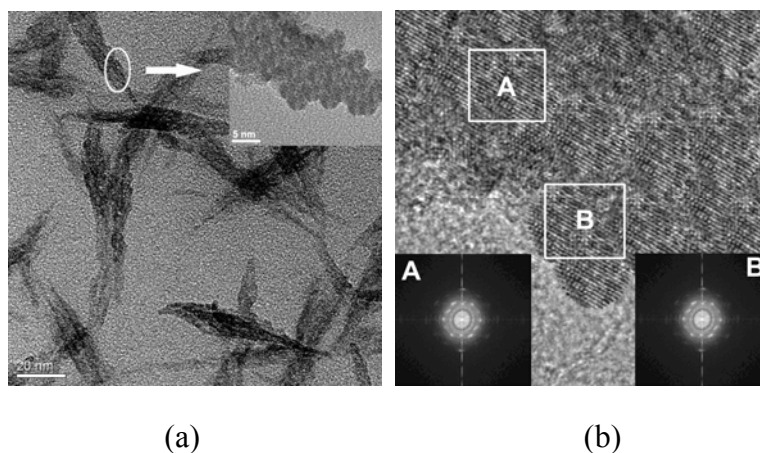

**Fig.S1 (a) High magnification TEM image (the inset is the enlargement of the frame), and (b) the FFT patterns originated from the marked areas in the HRTEM image of the as-prepared black anatase TiO<sub>2</sub> nanoleaves.**

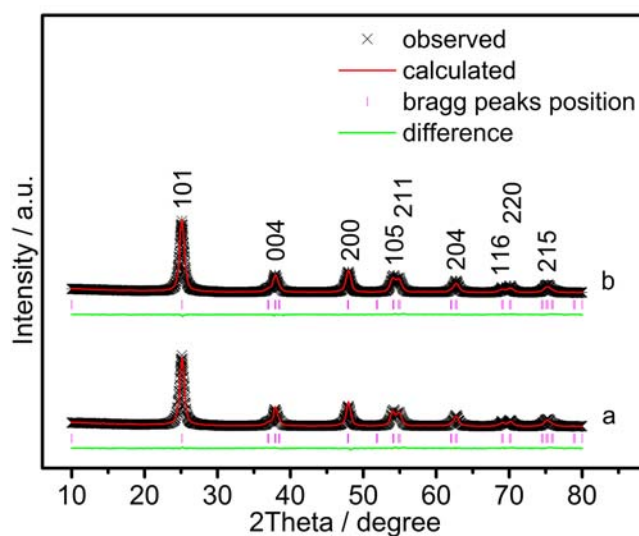

**Fig.S2 XRD Rietveld refinement for the diffraction patterns of (a) the commercial white anatase TiO<sub>2</sub> and (b) the commercial white anatase TiO<sub>2</sub> after treated by SPP with NH<sub>4</sub>Cl.**

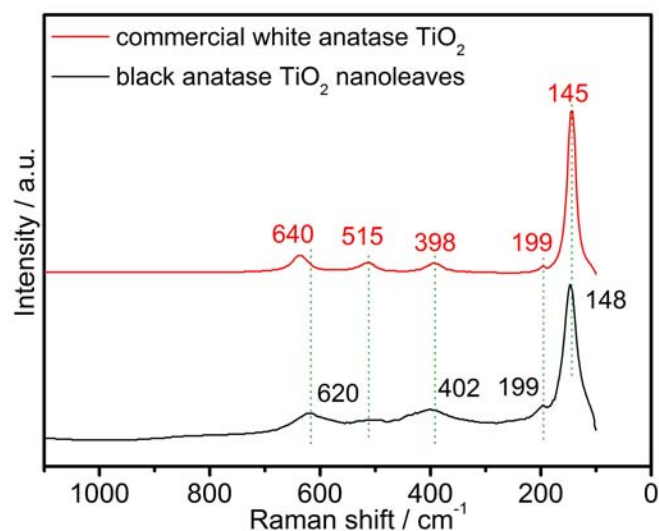

**Fig.S3 Raman spectra of the commercial white anatase  $\text{TiO}_2$  and black anatase  $\text{TiO}_2$  nanoleaves.**

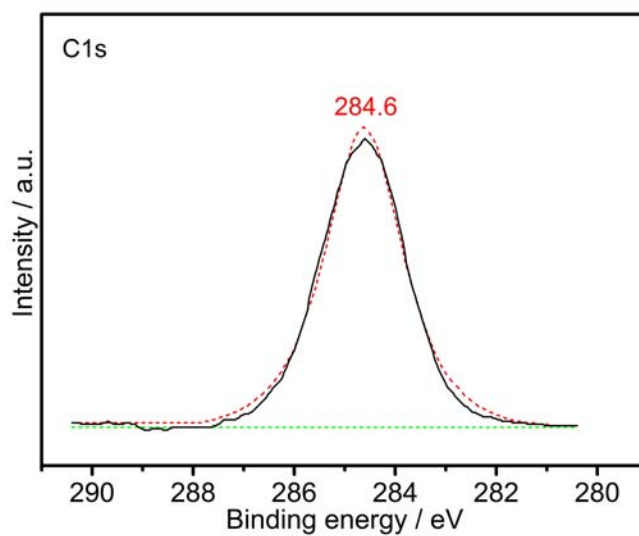

**Fig.S4 C1s high-resolution XPS spectrum for the black anatase  $\text{TiO}_2$  nanoleaves.**

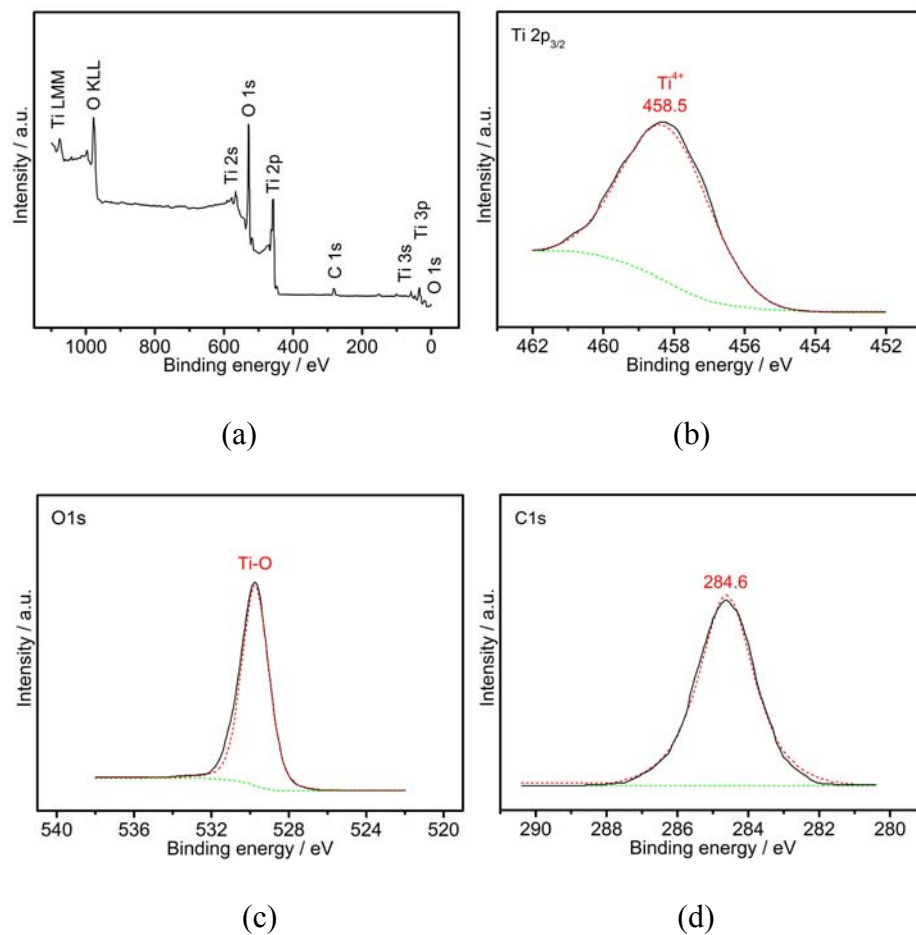

**Fig.S5 XPS spectra for the commercial white anatase TiO<sub>2</sub>: (a) survey spectrum; (b) Ti 2p<sub>3/2</sub>; (c) O 1s and (d) C 1s high-resolution spectra.**

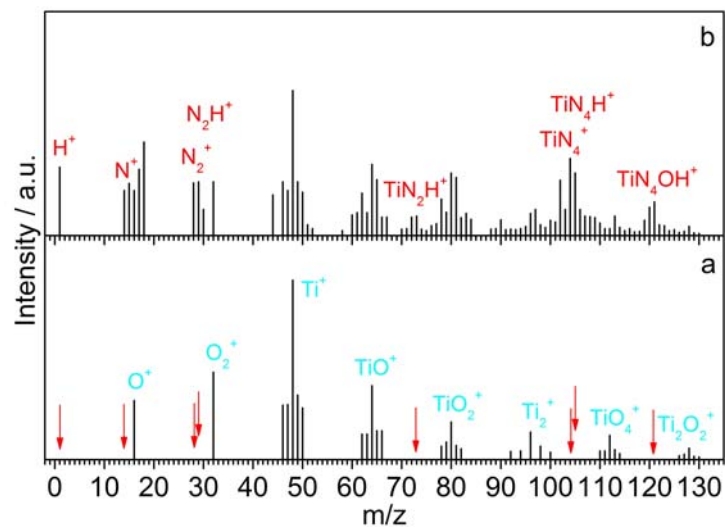

**Fig.S6 ToF-SIMS spectra of (a) the commercial white anatase TiO<sub>2</sub> and (b) the commercial white anatase TiO<sub>2</sub> after treated by SPP with NH<sub>4</sub>Cl.**

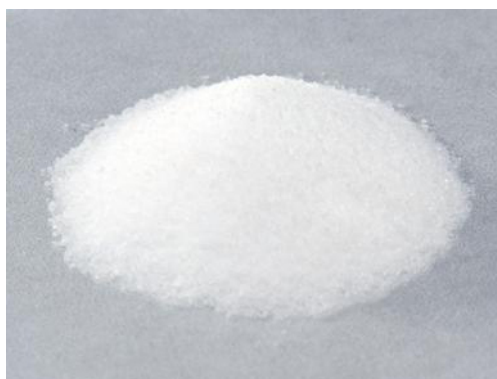

**(a)**

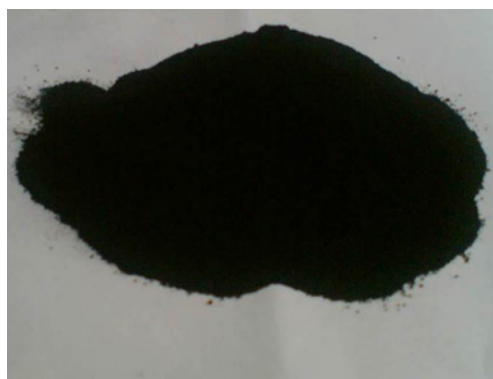

**(b)**

**Fig.S7 Photographs of (a) the commercial white anatase TiO<sub>2</sub> nanoleaves and (b) the commercial white anatase TiO<sub>2</sub> nanoleaves after treated by SPP with NH<sub>4</sub>Cl.**

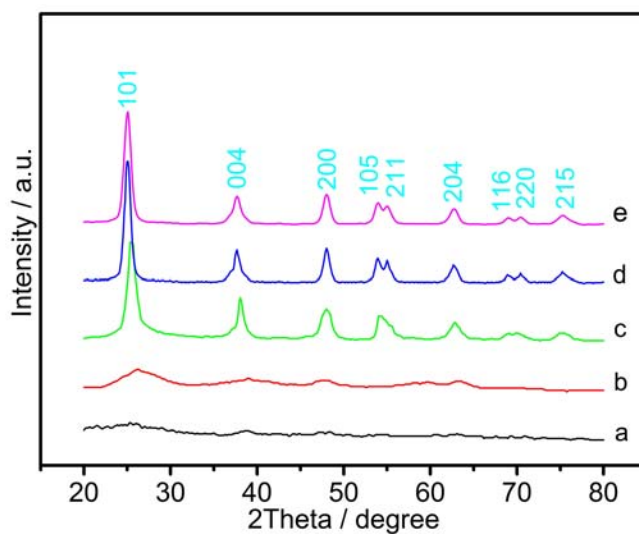

**Fig.S8.** XRD patterns of the black anatase TiO<sub>2</sub> nanoleaves prepared during SPP: (a) 0.5 min; (b) 1 min; (c) 2 min; (d) 5 min; (e) 10 min.

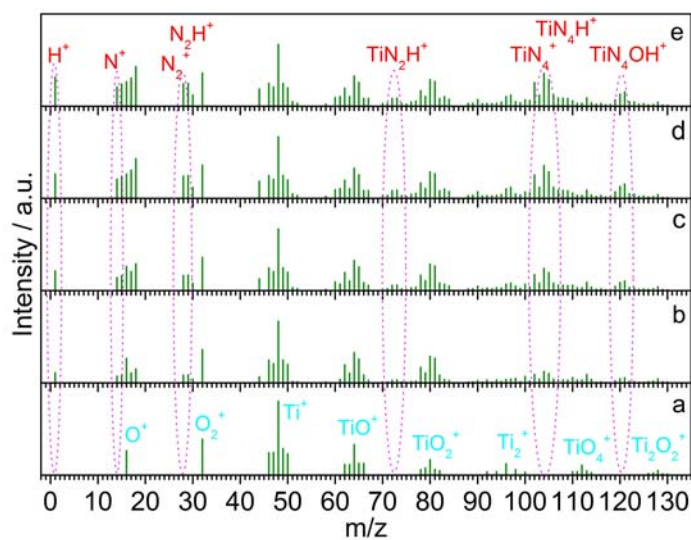

**Fig.S9.** ToF-SIMS spectra of the black anatase TiO<sub>2</sub> nanoleaves prepared during SPP: (a) 0.5 min; (b) 1 min; (c) 2 min; (d) 5 min; (e) 10 min.



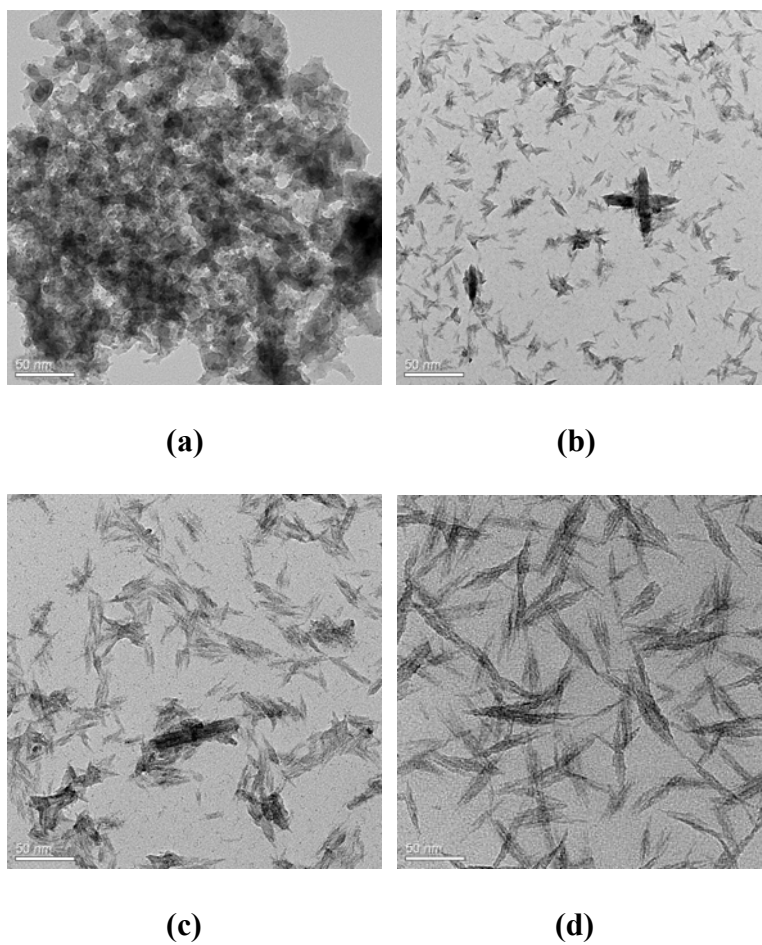

**Fig.S10 TEM images of the black anatase  $\text{TiO}_2$  nanoleaves obtained with different concentration of Brij-30: (a) 0 M, (b) 0.01 M, (c) 0.02M, (d) 0.05 M.**

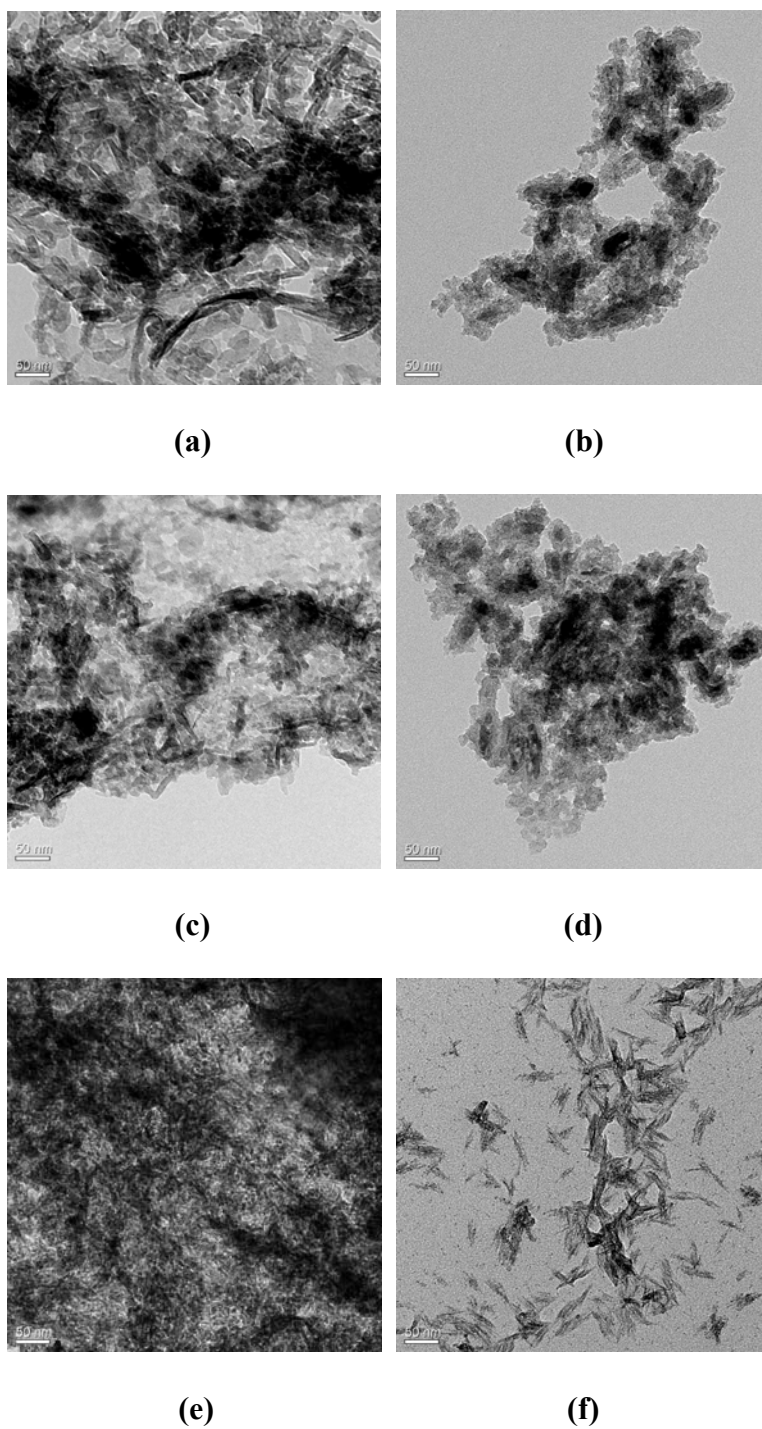

**Fig.S11. TEM images of the black anatase TiO<sub>2</sub> nanoleaves prepared by SPP with (a) P123; (b) ethylenediamine; (c) SDBS; (d) PVA; (e) PVP and (f) either of (a)–(e) after additional of Brij-30.**

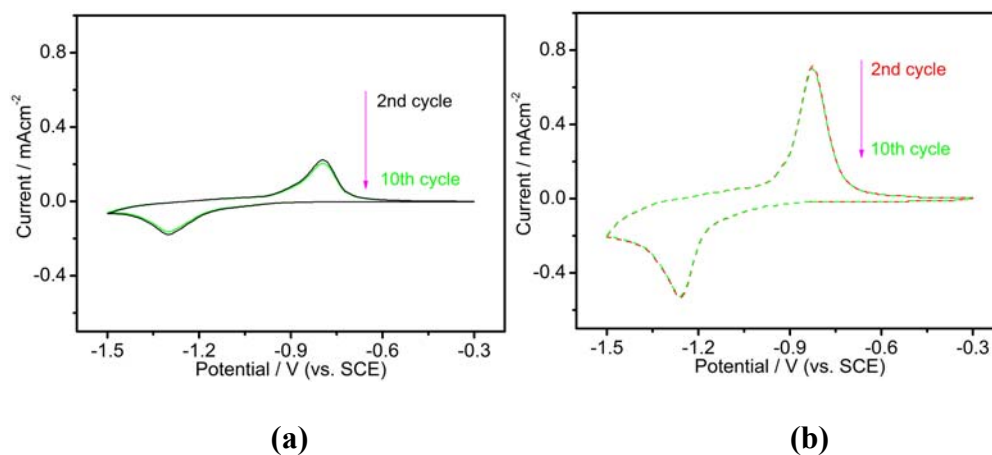

**Fig.S12** Cyclic voltammograms of (a) commercial white anatase  $\text{TiO}_2$  and (b) black anatase  $\text{TiO}_2$  nanoleaves electrodes at a scanning rate of  $1\text{mVs}^{-1}$  from the second to the tenth cycle.

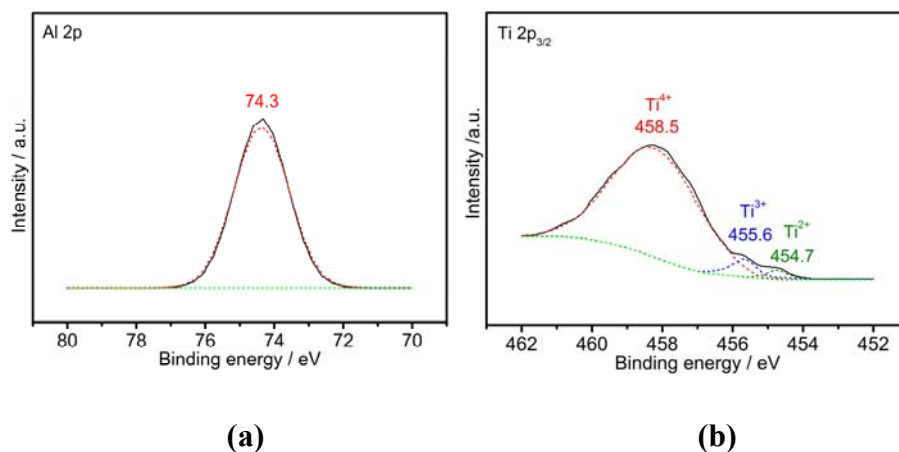

**Fig.S13** XPS spectra of the commercial white anatase  $\text{TiO}_2$  after being 1<sup>st</sup> discharged at  $0.05\text{Ag}^{-1}$  between -1.4 and -0.4 V (vs. SCE) with argon-ion sputtering for 3 min: (a) Al 2p and (b) Ti 2p<sub>3/2</sub>.

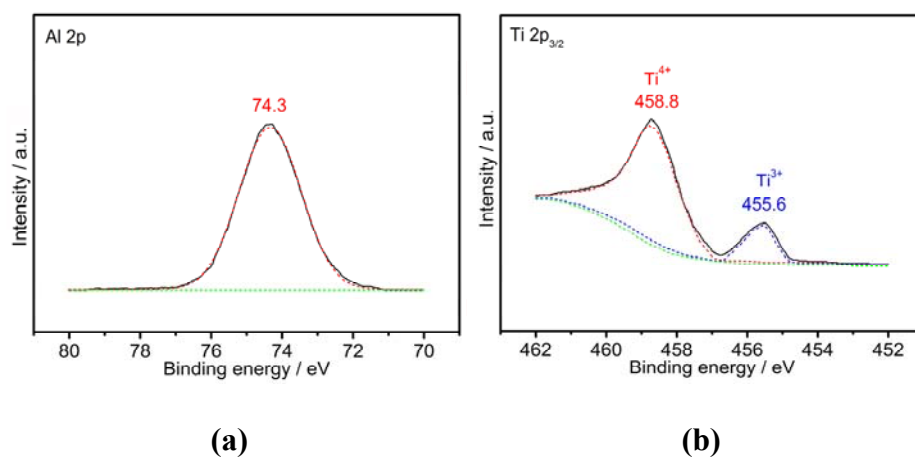

**Fig.S14 XPS spectra of the black anatase TiO<sub>2</sub> nanoleaves after being 1<sup>st</sup> discharged at 0.05 Ag<sup>-1</sup> between -1.4 and - 0.4 V (vs. SCE) with argon-ion sputtering for 3 min: (a) Al 2p and (b) Ti 2p<sub>3/2</sub>.**

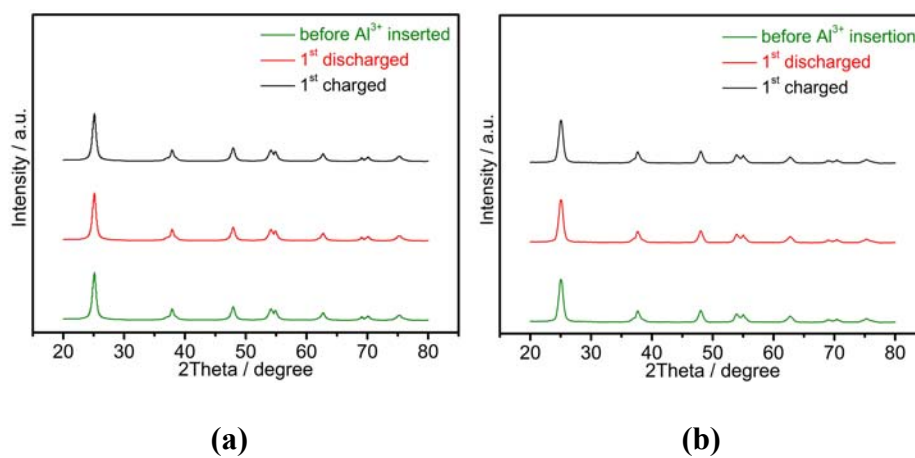

**Fig.S15 XRD patterns of the (a) commercial white anatase TiO<sub>2</sub>; (b) black anatase TiO<sub>2</sub> nanoleaves before Al<sup>3+</sup> insertion and after being 1<sup>st</sup> discharged and charged at 0.05 Ag<sup>-1</sup> between -1.4 and - 0.4 V (vs. SCE).**

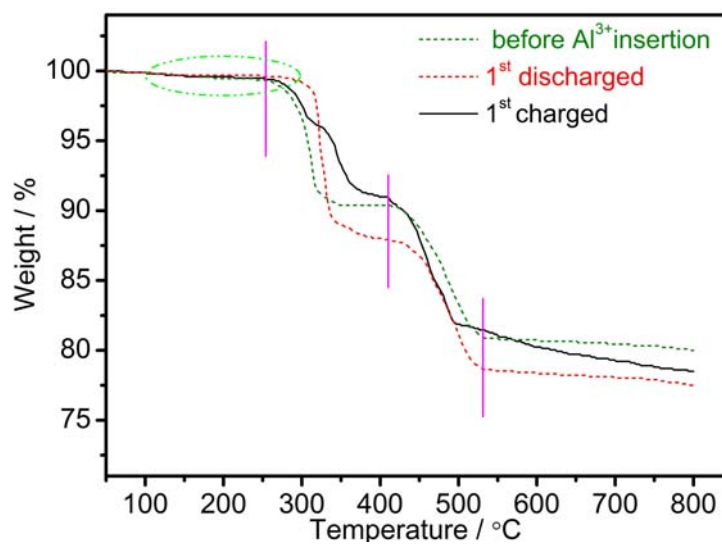

**Fig.S16** The typical curves of black anatase TiO<sub>2</sub> nanoleaves before Al<sup>3+</sup> insertion and after being 1<sup>st</sup> discharged and charged at 0.05 Ag<sup>-1</sup> between -1.4 and - 0.4 V (vs. SCE).

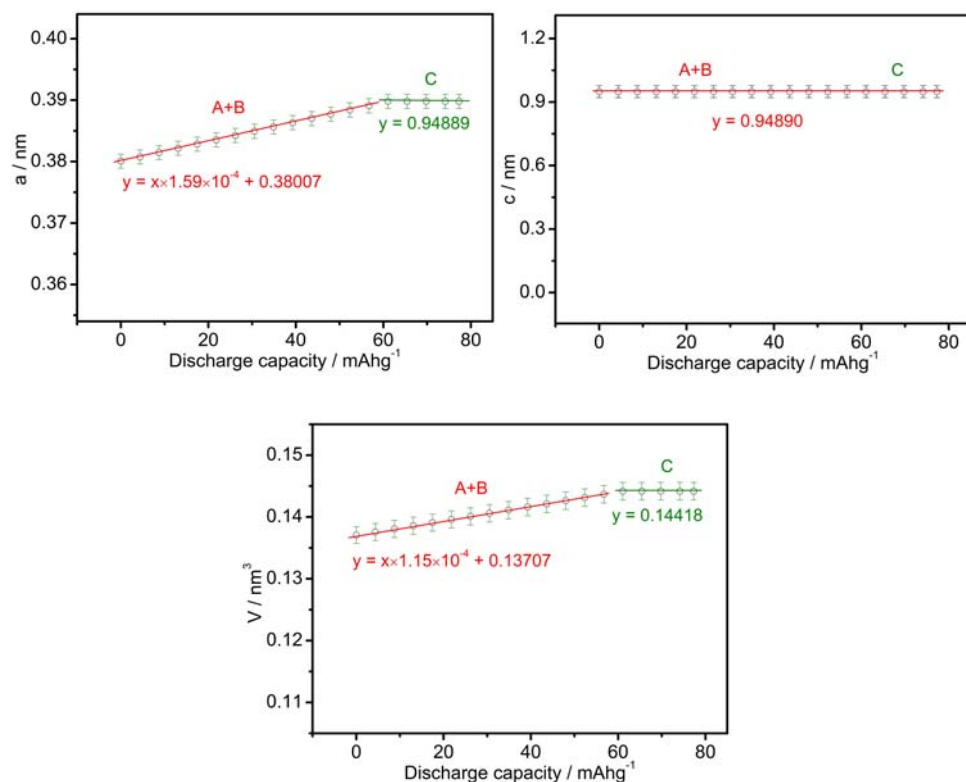

**Fig.S17** The changes of crystal parameters ( $a$ ,  $c$  and lattice volume  $V$ ) of commercial white anatase TiO<sub>2</sub> obtained from the in-situ XRD in A, B and C regions labeled in Fig.8 during the 1<sup>st</sup> discharge at 0.05 Ag<sup>-1</sup> between -1.4 and -0.4 V (vs. SCE).

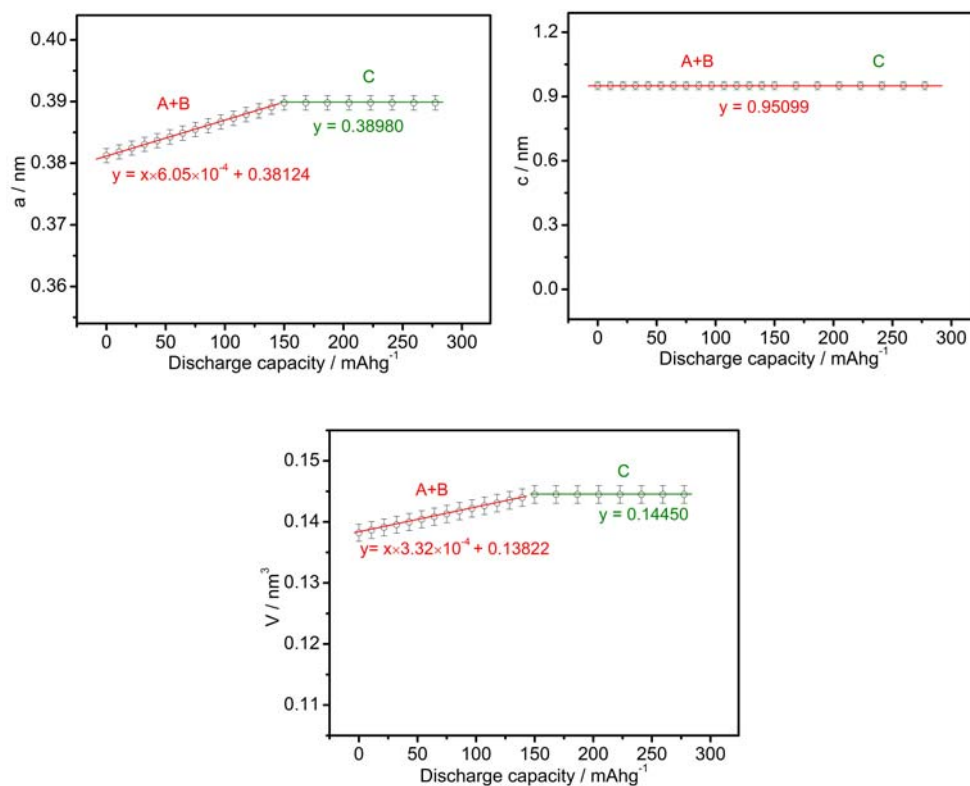

**Fig.S18** The changes of crystal parameters (*a*, *c* and lattice volume *V*) of black anatase TiO<sub>2</sub> nanoleaves obtained from the in-situ XRD in A, B and C regions labeled in Fig.8 during the 1<sup>st</sup> discharge at 0.05 Ag<sup>-1</sup> between -1.4 and - 0.4 V (vs. SCE).



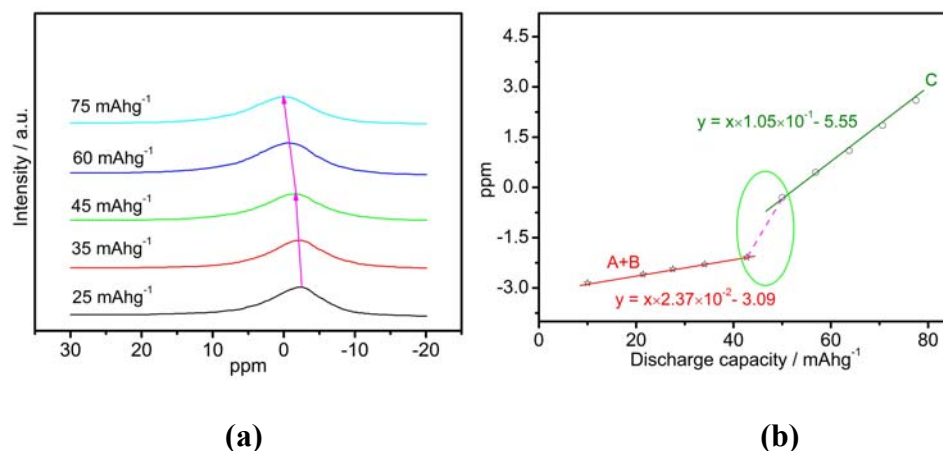

**Fig.S19 (a)** The typical *ex situ*  $^{27}\text{Al}$  MAS NMR curves and **(b)** the variation of shifts of commercial white anatase  $\text{TiO}_2$  in A, B and C regions labeled in Fig.8 during the 1<sup>st</sup> discharge at  $0.05 \text{ Ag}^{-1}$  between -1.4 and - 0.4 V (vs. SCE).

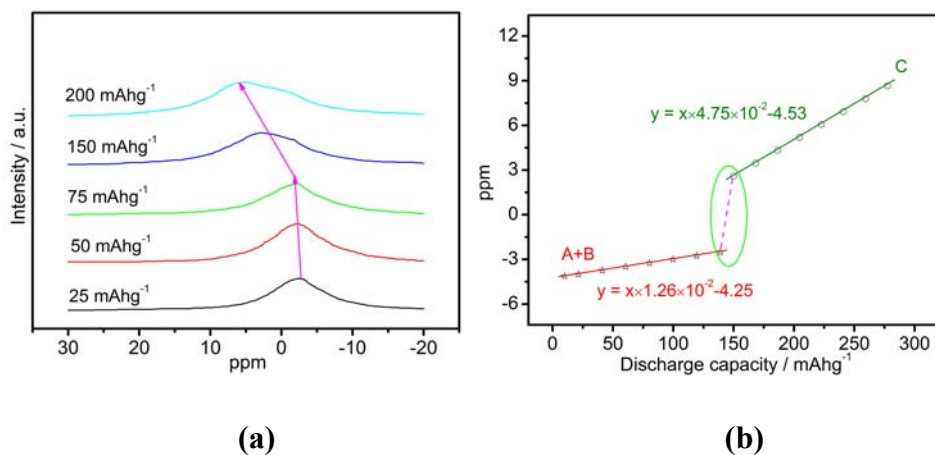

**Fig.S20 (a)** The typical *in-situ*  $^{27}\text{Al}$  MAS NMR curves and **(b)** the variation of shifts of black anatase  $\text{TiO}_2$  nanoleaves in A, B and C regions labeled in Fig.8 during the 1<sup>st</sup> discharge at  $0.05 \text{ Ag}^{-1}$  between -1.4 and - 0.4 V (vs. SCE).



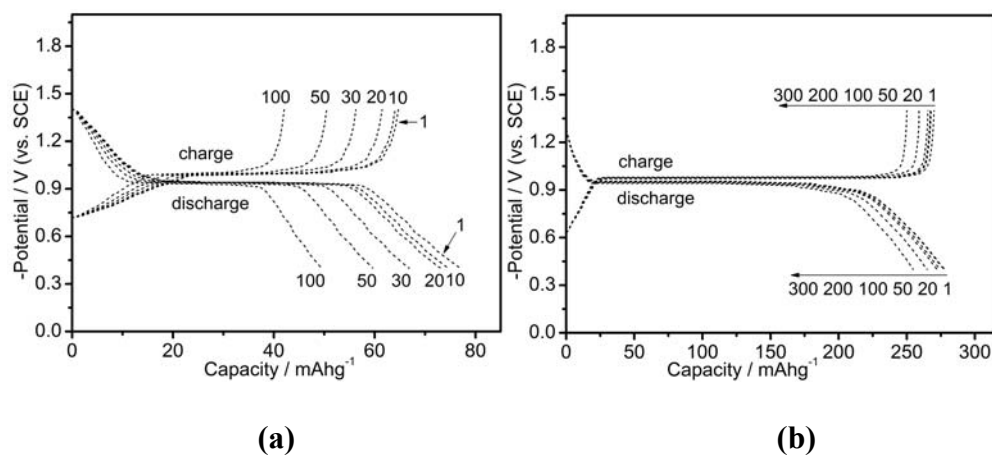

**Fig.S21** Charge-discharge curves of (a) commercial white anatase  $\text{TiO}_2$  and (b) black anatase  $\text{TiO}_2$  nanoleaves electrodes under a current rate of  $0.05 \text{ Ag}^{-1}$  at different cycles.

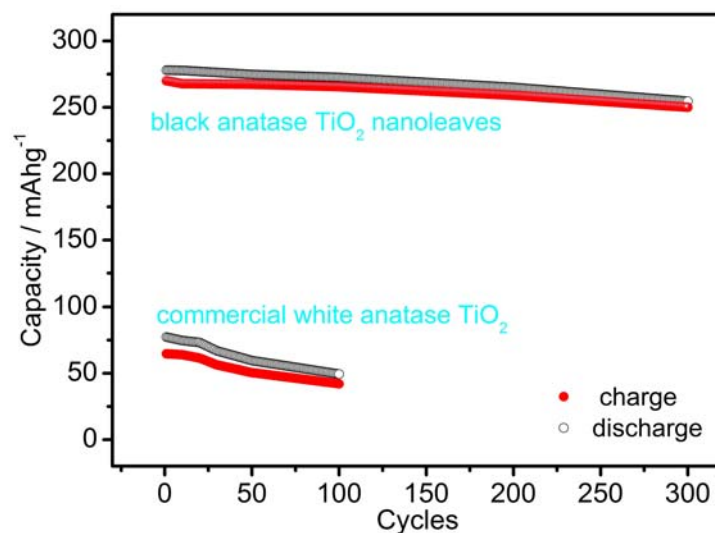

**Fig.S22** Cycle performance of commercial white anatase  $\text{TiO}_2$  and black anatase  $\text{TiO}_2$  nanoleaves electrodes at a current rate of  $0.05 \text{ Ag}^{-1}$ .

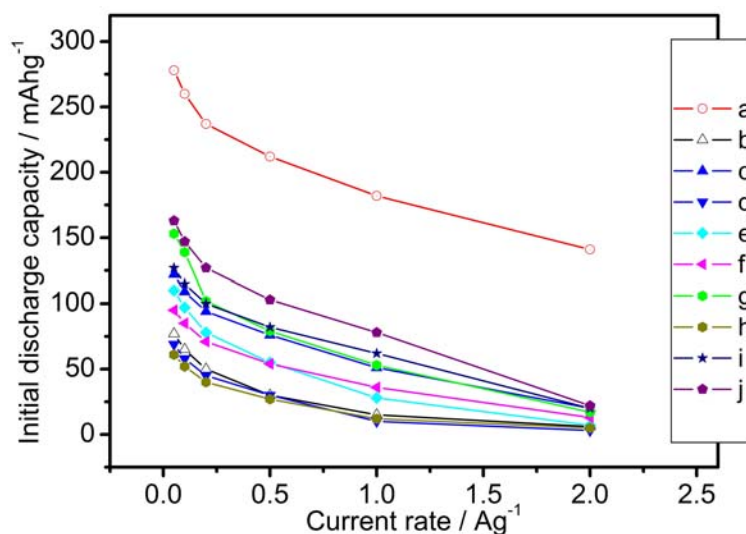

**Fig.S23 Rate performance comparison of the samples (a) black anatase TiO<sub>2</sub> nanoleaves in this work; (b) commercial white anatase TiO<sub>2</sub>; (c) black anatase TiO<sub>2</sub> prepared from (b) after SPP treatment with NH<sub>4</sub>Cl; (d) commercial TiO<sub>2</sub>-P25; (e) commercial anatase TiO<sub>2</sub>-UV100; (f) commercial white anatase TiO<sub>2</sub> nanotube; (g) black anatase TiO<sub>2</sub> nanotubes prepared from (f) after SPP treatment with NH<sub>4</sub>Cl; (h) amorphous white anatase TiO<sub>2</sub> obtained in our work after SPP for 0.5 min; (i) black anatase TiO<sub>2</sub> obtained in our work after SPP for 1 min; (j) black anatase TiO<sub>2</sub> obtained in our work after SPP for 2 min.**

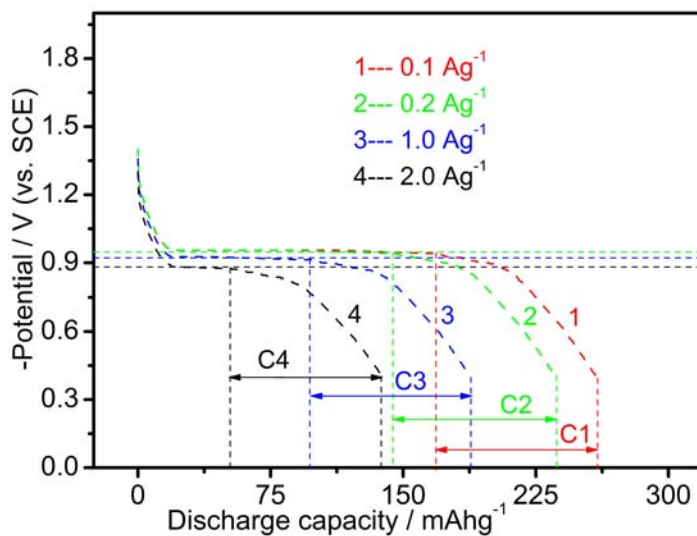

**Fig.S24** The 1st insertion curves at various rates of the  $\text{TiO}_2$  nanoleaves.

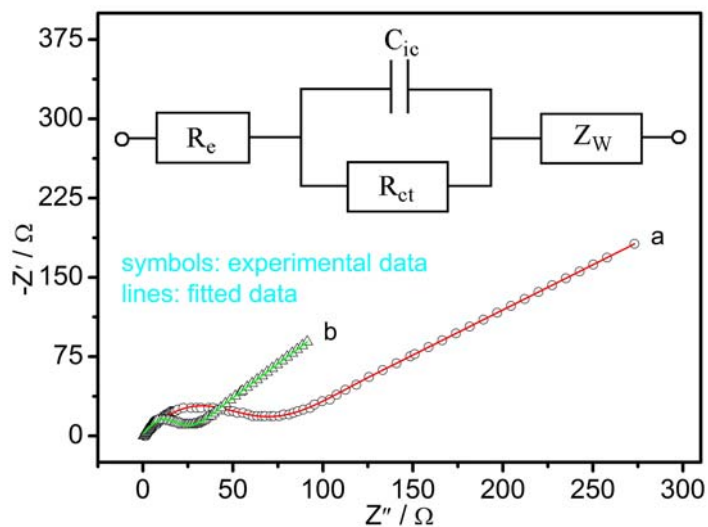

**Fig.S25** Nyquist plots with fitted lines of (a) commercial white anatase  $\text{TiO}_2$  and (b) black anatase  $\text{TiO}_2$  nanoleaves. The inset is the corresponding equivalent circuits.

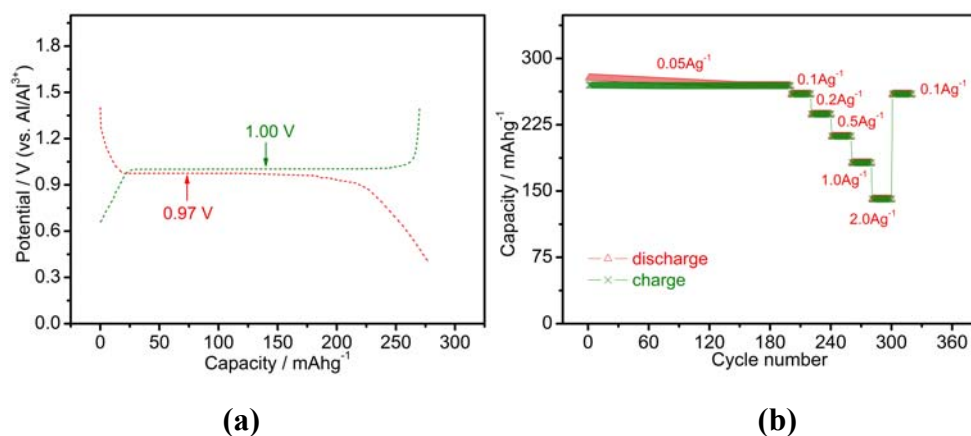

**Fig.S26 (a) The initial charge/discharge curves and (b) the variation of charge/discharge capacities with cycle numbers of  $\text{TiO}_2/\text{Al}$  two-electrode cell at different current rates between 0.4 and 1.4 V (vs.  $\text{Al}/\text{Al}^{3+}$ )**
